# Supplementary material for: Impact of Composting Methods on Nitrogen Retention and Losses during Dairy Manure Composting
Source: PubMed Central journal article supplement (PMC6765887; doi:10.3390/ijerph16183324), 2019-09-09
Supplement: ijerph-16-03324-s001.pdf [file ijerph-16-03324-s001.pdf]

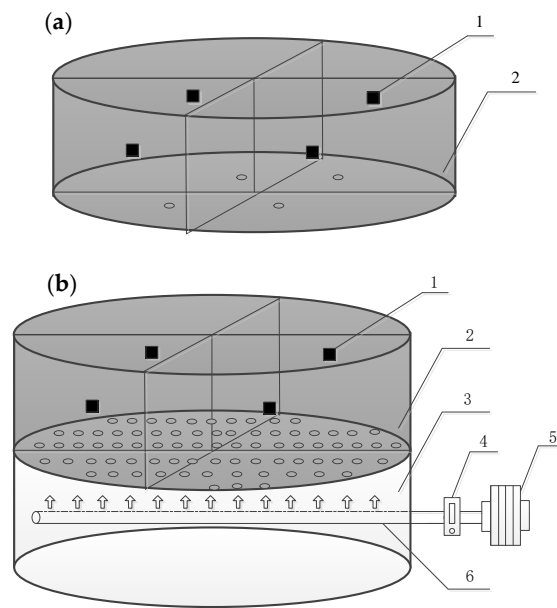

**Figure S1.** (a) Schematic diagram of composting reactors for farmer compost, anaerobic compost and mixed compost; (b) Schematic diagram of composting reactors for aerobic compost; 1—temperature sensor; 2—Pile layer; 3—Air distribution layer; 4—Rotameter; 5—Air pump; 6—Air distributor.

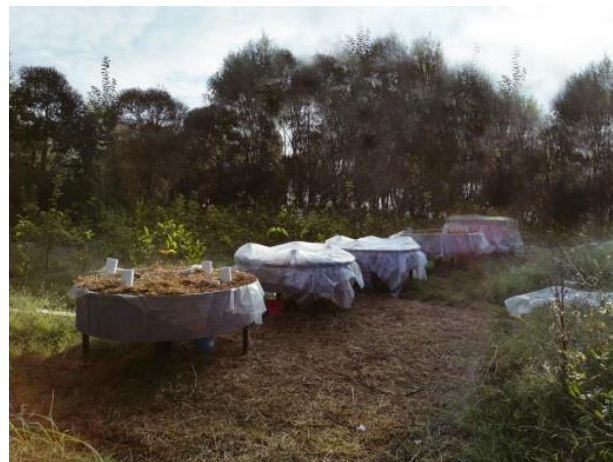

**Figure S2.** Photo of composting reactors.
